# Supplementary material
Source: PubMed Central journal article supplement (PMC1482636)
Supplement: pnas_0510436103_2.pdf [file pnas_0510436103_2.pdf]

|             |    |              |               |                        |                |              |
|-------------|----|--------------|---------------|------------------------|----------------|--------------|
|             |    | 10           | 20            | 30                     | 40             | 50           |
|             |    |              |               |                        |                |              |
|             |    |              | *             |                        |                | *            |
| LIPB (1W66) | 1  | MAGSIRSKLSAi | DVRLGTV-DY--- | RTAWQLQRELADARV-AGGAD- | TTTTLLEHPAVYTA |              |
| LPLA (2ART) | 1  | MEgRLLll     | ETPgNT---     | RMSLAYdeaiyrsfqygdKP-  | ILRFYRHDRSVII  |              |
| BIRA (1HXD) | 68 | -----G-GS    | VavLPVI-D     | STNQYLDRigel           | -----KSGD      | ACIAEYQQAGRG |

|             |     |       |              |         |                |                                  |
|-------------|-----|-------|--------------|---------|----------------|----------------------------------|
|             |     | 60    | 70           | 80      | 90             | 100                              |
|             |     |       |              |         |                |                                  |
|             |     |       |              | ****    | *              | *                                |
| LIPB (1W66) | 56  | GRRT  | ETHERPI----- | DGTPV   | VDTRGGKITWHG-- | pGQLVGYPIIGLAEPLD                |
| LPLA (2ART) | 48  | GYFQ  | VAEEEVdl     | dymkngi | MLARRYTG       | GGAVYHD--lGDLNFSVVRSS-DDMDITSMFR |
| BIRA (1HXD) | 118 | ----- | -----        | RRGRKWF | S              | pfGANLYLSMFWRLEQGPAAIGLSL        |

|             |     |               |             |              |              |                   |
|-------------|-----|---------------|-------------|--------------|--------------|-------------------|
|             |     | 110           | 120         | 130          | 140          | 150               |
|             |     |               |             |              |              |                   |
|             |     |               |             |              | *            | ***               |
| LIPB (1W66) | 108 | RLEESLIQVCAD  | LG-LHAG     | GRVDGR-----  | SGVWLPGRPARK | VAAIGVRVSR-----   |
| LPLA (2ART) | 105 | TMNEAVVNSLRIL | LG-LDARPGEL | ndvsipvnkktD | IMAGE---     | KKIMGAAGAMRK----- |
| BIRA (1HXD) | 152 | VIGIVMAEVL    | RKLGADKV    | RVKWP-----   | nDLYLQD---   | RKLAGILVELTGKTGDA |

|             |     |            |       |          |              |        |          |                     |
|-------------|-----|------------|-------|----------|--------------|--------|----------|---------------------|
|             |     | 160        | 170   | 180      | 190          | 200    | 210      |                     |
|             |     |            |       |          |              |        |          |                     |
|             |     | **         |       | *        |              |        |          |                     |
| LIPB (1W66) | 153 | ATTLHG     | FALN  | CDCD     | LAAFTAIVPCGI | SDAAVT | SLSAELGR | TVTVEVRATVAAAVCAALD |
| LPLA (2ART) | 156 | GAKLWHAAML | VHTD  | LDMLSAVL | KVPSTRERVA   | NVTDF  | VD--V    | SIDEVRNALIRGFSETH   |
| BIRA (1HXD) | 199 | AQIVIGAGI  | NMAMq | -----    | GWITLQ       | EAGIn- | L        | DRNTLAAMLIRELRAALE  |
