# Supplementary material
Source: PubMed Central journal article supplement (PMC1482636)

# 1. Endogenous pathway

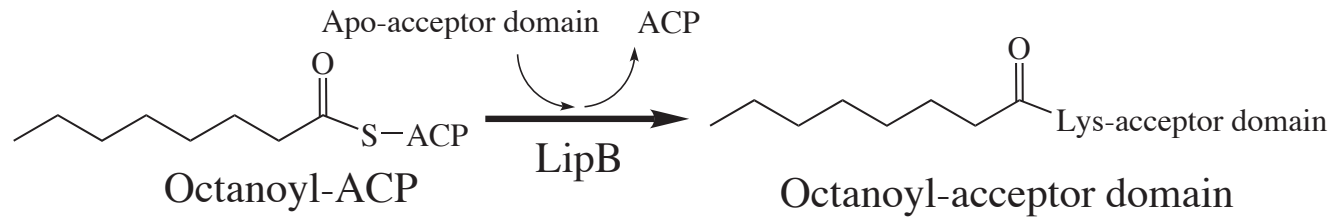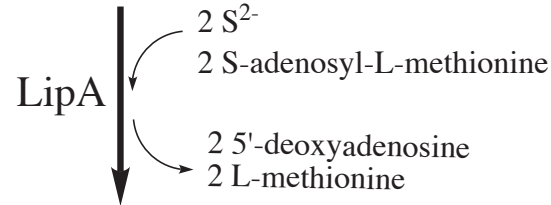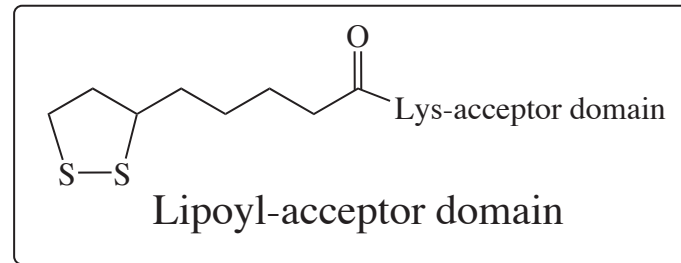

# 2. Exogenous pathway

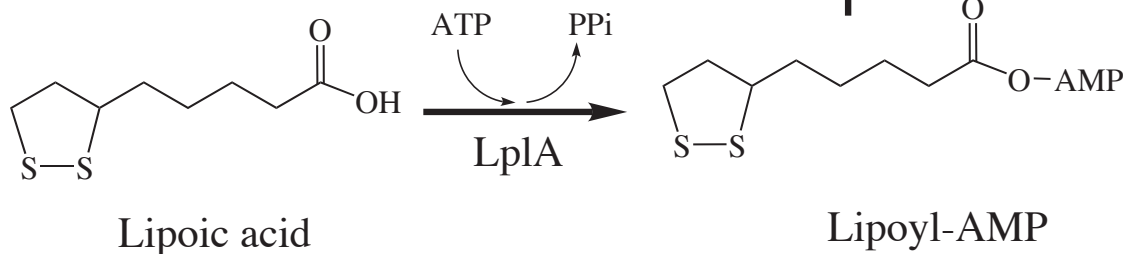

# Pathway in Mtb

+

-

Supplement: pnas_0510436103_1.pdf [file pnas_0510436103_1.pdf]

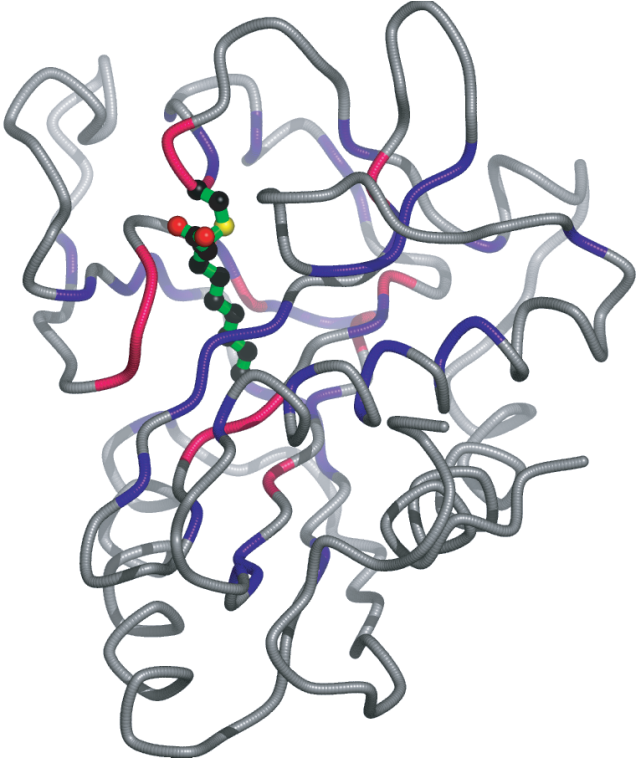

Supplement: pnas_0510436103_3.pdf [file pnas_0510436103_3.pdf]
